# Supplementary material for: Solid lipid nanoparticles (SLN) templating of macroporous silica beads
Source: Royal Society of Chemistry journal article supplement (doi:10.1039/c1ra00659b), 2011-01-01
Supplement: c1ra00659b.pdf [file c1ra00659b.pdf]

**Electronic Supplementary Information**  
**for**  
**Solid lipid nanoparticles (SLN) templating of macroporous silica**  
**beads**

Andreea Pasc,<sup>\*a</sup> Jean-Luc Blin<sup>a</sup>, Marie-José Stébé<sup>a</sup> and Jaafar Ghanbaja<sup>b</sup>

<sup>a</sup> SRS MC UMR 7565, Nancy-Université, BP 70239, F-54506 Vandoeuvre-lès-Nancy, France, <sup>b</sup> SCMEM, Nancy-University, BP 70239, 54506 Vandoeuvre-lès-Nancy, France

**Supporting information 1: X-ray scattering analysis**

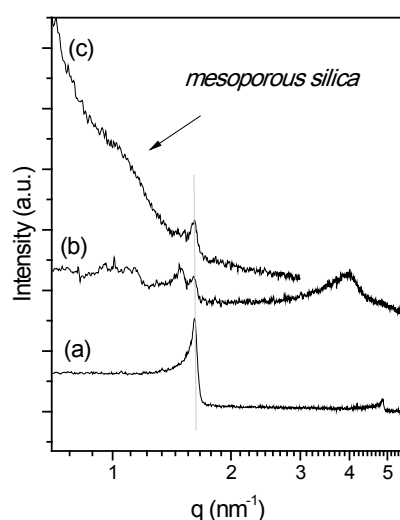

**Fig. S1.** SAXS measurements showing (a) the polymorphism of the powder NHP solid lipid, and the lamellar of the solid lipid in both (b) solid lipid particles and (c) hybrid SLN-silica material

X-ray measurements were realised with SAXSess mc2 (Anton Paar). It is attached to a ID 3003 laboratory X-Ray generator (General Electric), equipped with a sealed X-ray tube (PANalytical,  $\lambda_{\text{Cu (K}\alpha)}$  = 0.1542 nm, P = 3.3 kW). A multilayer mirror and a block collimator provide a monochromatic primary beam. A translucent beam stop allows the measurement of an attenuated primary beam at  $q=0$ . Samples are introduced into a quartz capillary (for liquids), a powder cell (for solids) or a paste cell (for viscous samples) and placed inside an evacuated chamber. Acquisition times are typically in the order of 1- 60 minutes. Scattering of X-ray beam is recorded by a CCD detector (Princeton Instruments, 2084 x 2084 pixels array with 24 x 24  $\mu\text{m}^2$  pixel size) for small angle measurements in the  $q$  range 0.04 to 5  $\text{nm}^{-1}$

( $q=4\pi\sin\theta/\lambda$ , where  $2\theta$  is the scattering angle). The detector is placed at 309 mm from the sample holder.

### Supporting information 2: Micelles characteristics of the Tween 20 dispersions

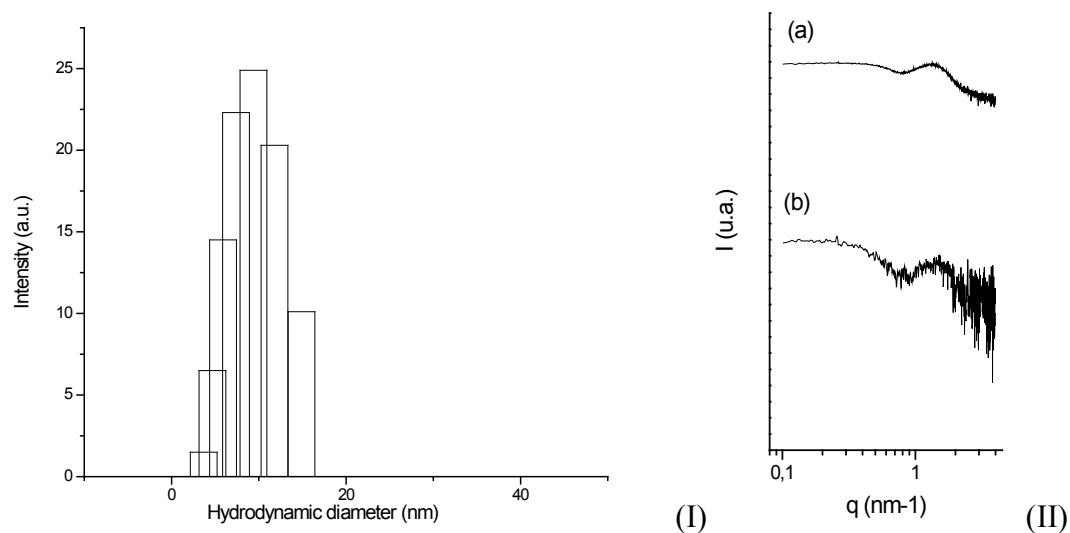

**Fig. S2.** (I) DLS analysis and (b) X-ray scattering data of Tween 20 dispersions [15% (a) and 1.5% (b)]

### Supporting information 3: Transmission electron microscopy

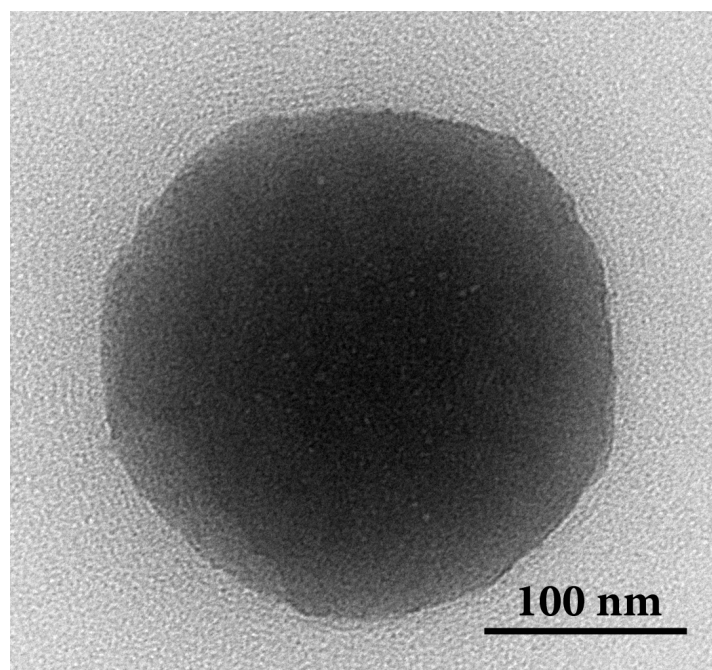

**Fig. S3.** Transmission electron microscopy of n-hexadecylpalmitate (NHP) based SLN

TEM was performed using a Philips CM20 type microscope at 200 keV. Samples for TEM were prepared by the negative-staining technique with a 2% ammonium molybdate. A drop of the SLNs sample diluted 25 times was left on the carbon-coated copper grids for 2 min. Then, excess liquid was sucked away with a filter paper and the deposited film was allowed to evaporate for 5 min. A drop of ammonium molybdate solution was left on the copper grid for 5 min and the excess liquid was sucked away with a filter paper.

#### Supporting information 4: Nitrogen adsorption/desorption isotherms

Nitrogen adsorption/desorption isotherms were obtained at  $-196\text{ }^{\circ}\text{C}$  over a wide relative pressure range from 0.01 to 0.995 with a volumetric adsorption analyzer, TRISTAR 3000 manufactured by Micromeritics. The samples were degassed under vacuum for several hours at  $320\text{ }^{\circ}\text{C}$  before nitrogen adsorption measurements. The pore diameter and size distribution were determined by the BJH (Barret, Joyner, Halenda) method.

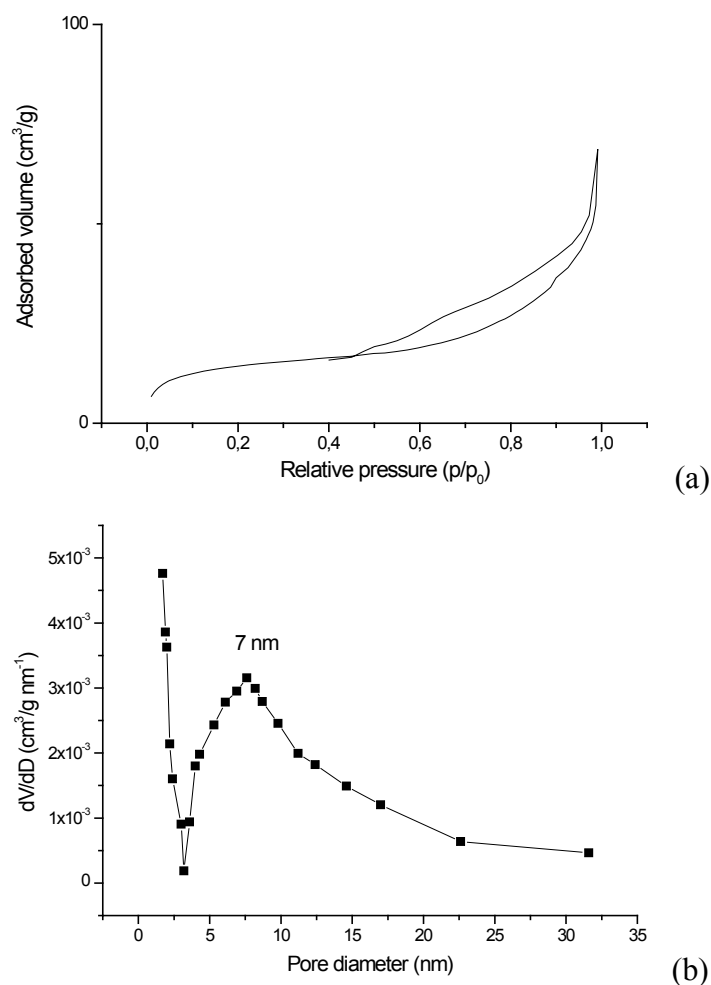

**Fig. S4.** Nitrogen adsorption–desorption isotherms (a) and the corresponding BJH pore size distribution curve (b) of the SLN-free silica beads
